# Supplementary material for: Near-infrared Ag2Se quantum dots with distinct absorption features and high fluorescence quantum yields
Source: Royal Society of Chemistry journal article supplement (doi:10.1039/c6ra04987g), 2016-01-01
Supplement: c6ra04987g1.pdf [file c6ra04987g1.pdf]

Electronic Supplementary Material (ESI) for RSC Advances. This journal is © The Royal Society of Chemistry 2016

## **Near-Infrared Ag<sub>2</sub>Se Quantum Dots with Distinct Absorption Features and High Fluorescence Quantum Yields**

Li-Juan Shi, Chun-Nan Zhu, He He, Dong-Liang Zhu, Zhi-Ling Zhang, Dai-Wen Pang and Zhi-Quan Tian\*

Key Laboratory of Analytical Chemistry for Biology and Medicine (Ministry of Education), College of Chemistry and Molecular Sciences, State Key Laboratory of Virology, The Institute for Advanced Studies, and Wuhan Institute of Biotechnology, Wuhan University, Wuhan 430072, P. R. China

\*Email: [zqtian@whu.edu.cn](mailto:zqtian@whu.edu.cn)

## EXPERIMENTAL SECTION

### Chemical Materials.

Selenium powder ( $\geq 99.5\%$ ), indocyanine green (ICG), 1-Octadecene (ODE, 90%), 1-octanethiol ( $\geq 98.5\%$ ), octylamine ( $\geq 99\%$ ), were purchased from Sigma Aldrich. Trioctylphosphine (TOP, 90%, Alfa), Tetrachloroethylene ( $C_2Cl_4$ , 99%, Alfa), polyacrylic acid (Aladdin, PAA, MW 2,000,). Silver acetate (AgAc), sodium borate, boracic acid, NaOH, concentrate nitric acid, n-hexane, methanol, dimethyl sulfoxide (DMSO), ethanol and acetone were purchased from China national medicines corporation, Ltd. Ultrapure water was purified using a Milli-Q water purification system.

### Preparation of Se Stock Solution.

ODE-Se stock solution: First, 10 mL of ODE in a three-neck flask was heated to 110 °C for 30 min under Ar flow to remove moisture and oxygen. Then 1 mmol selenium powder was swiftly added into the flask under positive Ar pressure, the mixture were heated to the critical temperature of 210 °C for 30 min, after which elemental selenium was completely dissolved to form an optically clear yellow solution.

TOPSe stock solution: 0.1 M of TOPSe was prepared by dissolving 0.1 mmol of selenium powder in 1 mL of TOP under inert atmosphere in the glovebox.<sup>1</sup>

### Synthesis of Ag<sub>2</sub>Se QDs

In a typical reaction, 0.2 mmol of AgAc, 1.61 mmol of 1-octanethiol were added into 5 mL of ODE in a three-neck flask under Ar flow, and then the mixture was heated to 165 °C. At this temperature, 1 mL of ODE-Se stock solution was swiftly injected into the heated mixture under vigorous stirring. The reaction solution began turning dark brown immediately after injection. Subsequently, the reaction temperature was reduced to 110 °C for the growth of the nanocrystals. Different sized Ag<sub>2</sub>Se QDs were synthesized by tuning the initial ratios of Ag/Se. The products were precipitated with ethanol, washed with methanol, and redispersed in nonpolar solvents for further characterization.

### Synthesis of Water-Soluble Ag<sub>2</sub>Se QDs<sup>2</sup>

The surfaces of Ag<sub>2</sub>Se QDs were modified by hydrophobic encapsulation with amphiphilic polymers octylamine-modified polyacrylic acid (OPA).<sup>2</sup> Both the hydrophobic QDs and OPA were dissolved in chloroform ( $CHCl_3$ ), the mass ratio of the QDs and OPA was 1:8, and mixed in a vial. The  $CHCl_3$  was evaporated under reduced pressure, leaving an OPA/QDs film. Borate saline buffer (pH 12.0) was added and the solution was vortexed and sonicated to dissolve the coated QDs, leaving a highly fluorescent, transparent solution. All the hydrophobic Ag<sub>2</sub>Se QDs were transferred into the water with a yield of  $\sim 100\%$  after capping the OPA.

### Extinction Coefficient Measurements<sup>3,4</sup>

The concentrations of the Ag<sub>2</sub>Se QDs dispersed in n-hexane were adjusted by the intensities of the exciton absorption peaks in the UV-vis-NIR absorption spectra. The samples were digested with concentrate nitric acid and diluted to certain volume with ultrapure water. The Ag ion concentrations were measured by inductively coupled plasma atomic emission spectroscopy (ICP-AES) (IRIS Intrepid II XSP).

### Characterizations

The UV-vis-NIR absorption spectra were obtained on a UV-3600 ultraviolet-visible-near-infrared (UV-vis-NIR) spectrophotometer (SHIMADZU). The size and morphology of the samples and the HRTEM images were examined on a JEM-2010FEF (UHR) electron microscope operated at 200 kV equipped with an Energy dispersive X-ray spectrometer (EDAX Inc.). EDX measurements were performed on it. X-ray photoelectron spectroscopy (XPS) spectra were obtained on an ESCALAB 250Xi X-ray Photoelectron Spectrometer (Thermo Scientific, US). Powder X-ray diffraction (XRD) patterns of the dried samples were performed on a Bruka D8 Advanced X-Ray diffractometer (Bruker axs) at a scanning rate of  $0.5^\circ \text{ min}^{-1}$  using Cu K $\alpha$  radiation (wavelength 1.5406 Å). The NIR fluorescence spectra were recorded on a Fluorolog-3 fluorescence spectrophotometer (HORIBA JOVIN YVON INC.) equipped with a liquid nitrogen cooled InGaAs detector (between 800 and 1600 nm). ICG ( $\Phi \approx 0.13$  in DMSO) was used as the reference to determine the fluorescence QY. Fourier transform infrared spectroscopy (FT-IR) tests were conducted on a Thermo Scientific Nicolet iS10 spectrometer.

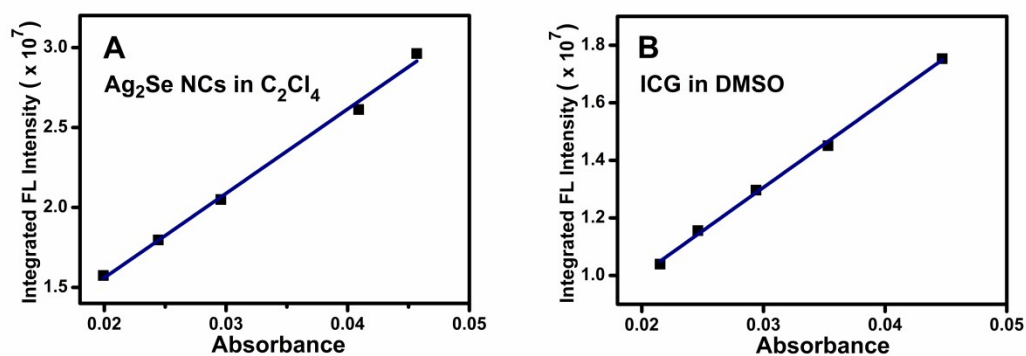

Fig S1. Integrated fluorescence intensity versus absorbance<sup>3,4</sup> of the as-prepared Ag<sub>2</sub>Se nanocrystals in C<sub>2</sub>Cl<sub>4</sub> (A) and ICG in DMSO (B).

Table S1. Comparison of different characteristics of synthesized Ag<sub>2</sub>Se QDs with different Se precursors.

| Ref            | Se precursor                 | Absorption (nm)            | Emission (nm) | FWHM (nm) | Size (nm) | FL QY <sub>max</sub> (%) |
|----------------|------------------------------|----------------------------|---------------|-----------|-----------|--------------------------|
| Our manuscript | ODE-Se                       | 830~954                    | 958~1020      | 142~164   | 1.9~3.1   | 23.4%                    |
| 10             | TOPSe                        | 770, 1000                  | 1030, 1250    | 250~300   | 2.0, 3.4  | 1.76%                    |
| 3              | TOPSe                        | 770~1070<br>(Tauc plot)    | 1080~1330     | 200~300   | 3.1~3.9   | 9.58%                    |
| 17             | TOPSe                        | 810~1085<br>(Gaussian fit) | —             | —         | 1.9~9.4   | —                        |
| 8              | NaHSe                        | —                          | 1300          | 125~140   | 3.4       | 29.4%                    |
| 2              | GSSeH                        | —                          | 700~820       | 90~120    | 1.5~2.4   | 3.09%                    |
| 11             | Hydrazine hydrate-Se complex | —                          | 966~1228      | 49~61     | 3.3~6.1   | 12.2%                    |

Note: The FWHM of the reported Ag<sub>2</sub>Se QDs of the references (ref. 10, 3, 17, 8, 2) are approximate.

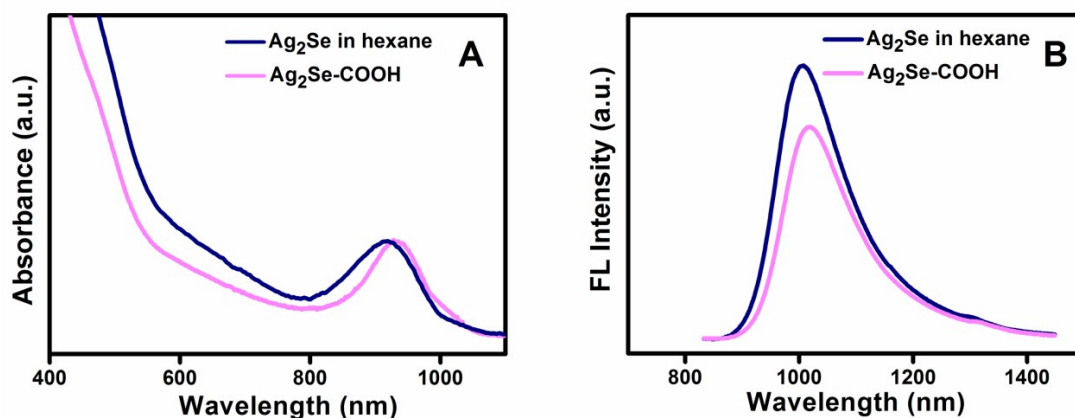

Fig S2 UV-vis-NIR absorption (A) and fluorescence emission (B) spectra of hydrophobic Ag<sub>2</sub>Se QDs and hydrophilic Ag<sub>2</sub>Se -COOH QDs.

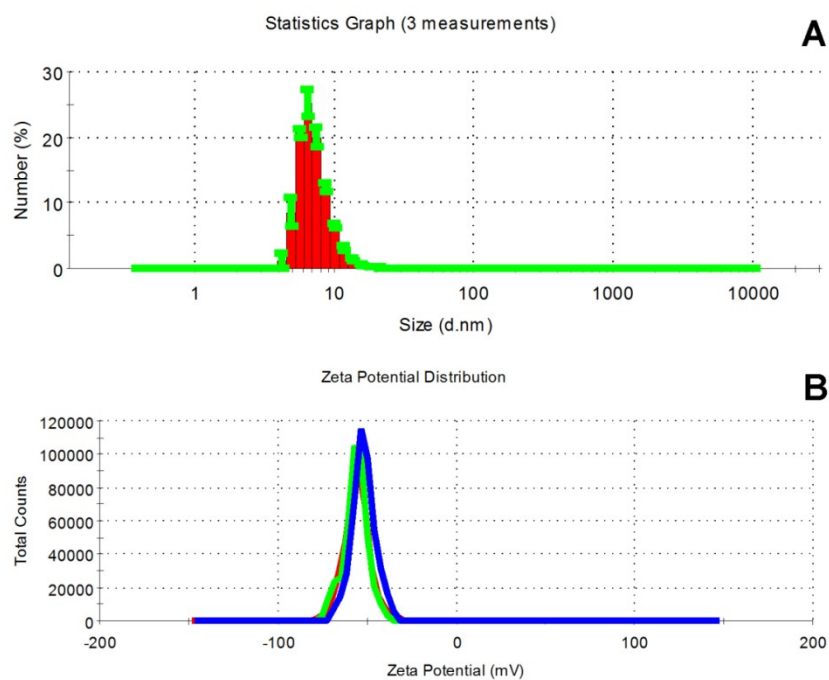

Fig S3. (A) Dynamic hydrogen diameter ( $8.13 \pm 0.60$  nm) and (B) zeta potential distributions ( $-52.1 \pm 2.41$  mV) of the  $\text{Ag}_2\text{Se-COOH}$  QDs with emission at 1010 nm.

Table S2. ICP-AES results of the  $\text{Ag}_2\text{Se}$  nanocrystals with different sizes

| sample | d (nm) | c (Ag) (ppm) | c (Se) (ppm) | atomic ratio of Ag/Se |
|--------|--------|--------------|--------------|-----------------------|
| a      | 1.9    | 21.64        | 5.651        | 2.80:1                |
| b      | 2.6    | 30.82        | 8.141        | 2.77:1                |
| c      | 2.8    | 22.38        | 6.06         | 2.70:1                |
| d      | 3.1    | 19.58        | 6.159        | 2.33:1                |
| e      | 3.3    | 20.84        | 8.091        | 1.89:1                |

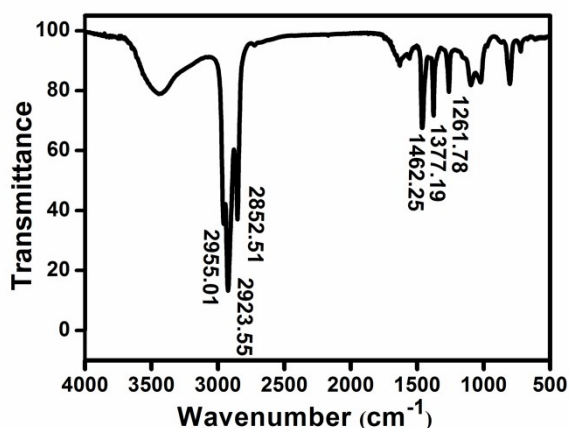

Fig S4. FT-IR spectrum of the as-prepared  $\text{Ag}_2\text{Se}$  nanocrystals. The peaks at  $2955\text{ cm}^{-1}$ ,  $2924\text{ cm}^{-1}$ , and  $2853\text{ cm}^{-1}$  were ascribed to the stretching vibrations of  $\text{CH}_2$  and  $\text{CH}_3$  in the alkane chain. The bending vibrations of  $\text{C-CH}_3$  and  $\text{CH}_2$  were located at  $1377\text{ cm}^{-1}$  and  $1464\text{ cm}^{-1}$  respectively. The peak of  $1262\text{ cm}^{-1}$  was ascribed to  $\text{CH}_2\text{-S}$ . The above vibration absorption peaks of alkane and  $\text{CH}_2\text{-S}$  matched well with the IR peaks of the pure 1-octanethiol.

Table S3. The evolution of the absorption peaks with different injection temperature and growth time.

| Injection temperature ( $^{\circ}\text{C}$ ) | 125 | 145 | 165 |
|----------------------------------------------|-----|-----|-----|
| 1 min (nm)                                   | 910 | 920 | 940 |
| 5 min (nm)                                   | 930 | 934 | 945 |
| 15 min (nm)                                  | 938 | 944 | 950 |
| 30 min (nm)                                  | 944 | 948 | 952 |

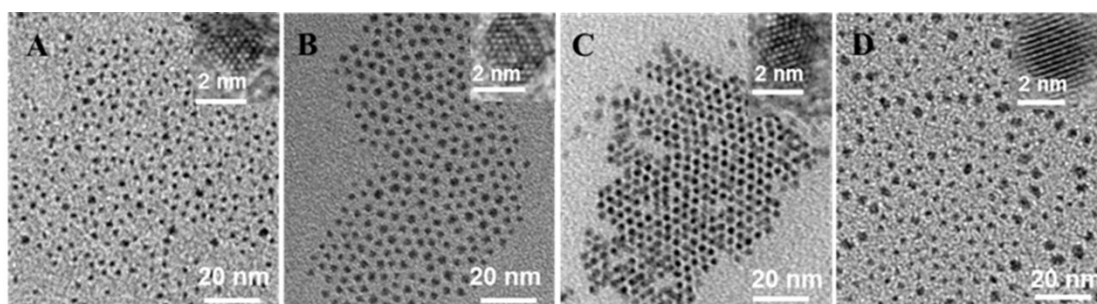

Fig S5. TEM images (A, B, C, D), HRTEM images (A, B, C, D, inset) of  $\text{Ag}_2\text{Se}$  nanocrystals with different initial ratios of Ag to Se: (A) 6:1,  $1.9 \pm 0.26\text{ nm}$ ; (B) 4:1,  $2.6 \pm 0.39\text{ nm}$ ; (C) 2:1,  $2.8 \pm 0.35\text{ nm}$ ; (D) 1:1,  $3.1 \pm 0.63\text{ nm}$ .

Table S4. The different  $\epsilon$  for the lowest transitions of different sized  $\text{Ag}_2\text{Se}$  QDs.

| sample | absorption peak (nm) | size measured by TEM (nm) | extinction coefficient $\epsilon (10^5\text{ cm}^{-1}\text{ M}^{-1})$ |
|--------|----------------------|---------------------------|-----------------------------------------------------------------------|
| a      | 830                  | 1.9                       | 0.17                                                                  |

|   |     |     |      |
|---|-----|-----|------|
| b | 895 | 2.6 | 0.32 |
| c | 944 | 2.8 | 0.55 |
| d | 954 | 3.1 | 1.15 |

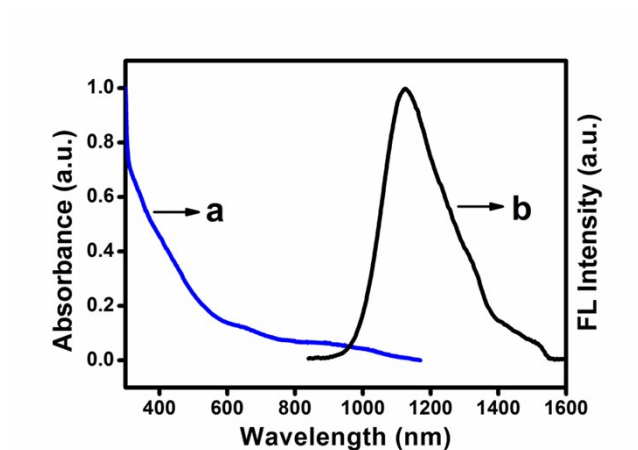

Fig S6. UV-vis-NIR absorption (a) and fluorescence emission spectra (b) of the 3.3 nm Ag<sub>2</sub>Se nanocrystals.

## REFERENCES

- 1 C. N. Zhu, P. Jiang, Z. L. Zhang, D. L. Zhu, Z. Q. Tian and D. W. Pang, *ACS Appl. Mater. Interfaces*, 2013, **5**, 1186-1189.
- 2 M. Zhou, E. Nakatani, L. S. Gronenberg, T. Tokimoto, M. J. Wirth, V. J. Hruby, A. Roberts, R. M. Lynch and I. Ghosh, *Bioconjugate Chem*, 2007, **18**, 323-332.
- 3 W. W. Yu, L. H. Qu, W. Z. Guo and X. G. Peng, *Chem. Mater*, 2003, **15**, 2854-2860.
- 4 I. Moreels, K. Lambert, D. D. Muynck, F. Vanhaecke, D. Poelman, J. C. Martins, G. Allan and Z. Hens, *Chem. Mater*, 2007, **19**, 6101-6106.
